# Supplementary material for: A Comprehensive Metabolism-Related Gene Signature Predicts the Survival of Patients with Acute Myeloid Leukemia
Source: MDPI journal article supplement (doi:10.3390/genes15010063), 2023-12-31
Supplement: s1 [file s1]

## Supplementary Materials

### Methods

*Differentiation of metabolic status of the patients by the expression of corresponding rate-limiting enzymes*

Firstly, we used the average of the sum of HK1, HK2, and HK3 expression values to represent the expression value of hexokinase. This way, the expression value of phosphofructokinase-1 and pyruvate kinase were calculated. Secondly, the sum of the expression values of these three rate-limiting enzymes in glycolysis was calculated to represent the value of glycolysis pathway activity. Similarly, we calculated the sum of the expression values of corresponding rate-limiting enzymes of the TCA cycle pathway and fatty acid metabolism pathway. Thirdly, we calculated the sum of the values of glycolysis, fatty acid and, the TCA cycle activity to represent the metabolism value. Finally, we separated the TCGA-LAML training cohort into metabolism<sup>high</sup> and metabolism<sup>low</sup> groups by the median metabolism value. The Formula is as follows:

$$\text{Value of Glycolysis activity} = \frac{(E_{HK1} + E_{HK2} + E_{HK3})}{3} + \frac{(E_{PFKL} + E_{PFKM} + E_{PFKP})}{3} + \frac{(E_{PKLR} + E_{PKM})}{2}$$

$$\text{Value of TCA cycle activity} = E_{CS} + \frac{(E_{IDH1} + E_{IDH2} + E_{IDH3A} + E_{IDH3B} + E_{IDH3G})}{5} + \frac{(E_{OGDH} + E_{DLST} + E_{DLD})}{3}$$

$$\text{Value of Fatty acid metabolism activity} = \frac{(E_{CPT1A} + E_{CPT1B} + E_{CPT2})}{3}$$

Metabolism value = value of Glycolysis activity + value of TCA cycle activity + value of Fatty acid metabolism activity

Where  $E$  is the expression value of key rate-limiting enzyme genes.

**Table S1.** The overall features of the TCGA-LAML, Beat-AML, GSE37642, GSE10358, and GSE12417 databases.

|                                | TCGA-LAML | Beat-AML | GSE37642 | GSE10358 | GSE12417 |
|--------------------------------|-----------|----------|----------|----------|----------|
| Number of cases                | 131       | 252      | 91       | 73       | 136      |
| The time frames when diagnosed | 2001-2010 | NA       | NA       | NA       | NA       |
| Created in the year            | 2007      | 2015     | 2012     | 2008     | 2008     |

NA, not available.

**Table S2.** Metabolic pathways that were significantly enriched (FDR<0.25) in the gene expression data of the group with short-term survival (OS<12 months) compared with the group with long-term survival (OS>12 months) in the TCGA-LAML database.

| Gene set name from Molecular Signature Database               | Description of Gene set                                                                                              | Size <sup>1</sup> | NES <sup>2</sup> | FD <sup>3</sup> |
|---------------------------------------------------------------|----------------------------------------------------------------------------------------------------------------------|-------------------|------------------|-----------------|
| GOBP_FRUCTOSE_1_6_BISPHOSPHATE_METABOLIC_PROCESS <sup>4</sup> | Genes involved in the chemical reactions and pathways involving fructose 1,6-bisphosphate collected by Gene Ontology | 9                 | - 1.76           | 0.24 6          |

---

|                                                                     |                                                                                                  |     |   |      |      |   |
|---------------------------------------------------------------------|--------------------------------------------------------------------------------------------------|-----|---|------|------|---|
| MOOTHA_GLUONEOGENESIS <sup>5</sup>                                  | Genes involved in gluconeogenesis collected by Broad Institute                                   | 29  | - | 0.24 | 1.56 | 6 |
| MODULE_152 <sup>6</sup>                                             | Genes involved in metabolism in Cancer collected by Broad Institute                              | 122 | - | 0.22 | 1.55 | 8 |
| REACTOME_PYRUVATE_METABOLISM_AND_CITRIC_ACID_TCA_CYCLE <sup>7</sup> | Pyruvate metabolism and TCA cycle collected by Reactome Database                                 | 54  | - | 0.22 | 1.54 | 4 |
| MOOTHA_TCA                                                          | Genes involved in TCA cycle collected by Broad Institute                                         | 16  | - | 0.21 | 1.53 | 2 |
| MODULE_307                                                          | Genes involved in metabolism in Cancer collected by Broad Institute                              | 25  | - | 0.20 | 1.53 | 3 |
| REACTOME_MITOCHONDRIAL_FATTY_ACID_BETA_OXIDATION                    | Genes involved in Mitochondrial Fatty Acid Beta-Oxidation collected by Reactome Database         | 37  | - | 0.19 | 1.52 | 7 |
| BIOCARTA_ETC_PATHWAY <sup>8</sup>                                   | Genes involved in Electron Transport Reaction in Mitochondria collected by BioCarta Database     | 10  | - | 0.18 | 1.52 | 3 |
| KEGG_OXIDATIVE_PHOSPHORYLATION <sup>9</sup>                         | Genes involved in Oxidative phosphorylation collected by Kyoto Encyclopedia of Genes and Genomes | 125 | - | 0.17 | 1.51 | 9 |
| WP_TCA_CYCLE_AKA_KREBS_OR_CITRIC_ACID_CYCLE <sup>10</sup>           | Genes involved in TCA cycle collected by WikiPathways Database                                   | 18  | - | 0.18 | 1.50 | 0 |
| REACTOME_CITRIC_ACID_CYCLE_TCA_CYCLE                                | Genes involved in TCA cycle collected by Reactome Database                                       | 22  | - | 0.19 | 1.48 | 3 |
| WP_AEROBIC_GLYCOLYSIS                                               | Genes involved in aerobic glycolysis collected by WikiPathways Database                          | 11  | - | 0.18 | 1.48 | 5 |
| MOOTHA_FFA_OXYDATION                                                | Genes involved in free fatty acid oxidation collectdy by Broad Institute                         | 23  | - | 0.20 | 1.45 | 6 |
| MOOTHA_ROS                                                          | Genes involved in Reactive oxidative species collected by Broad Institute                        | 7   | - | 0.21 | 1.43 | 8 |

|                                |                                                                  |     |   |      |      |   |
|--------------------------------|------------------------------------------------------------------|-----|---|------|------|---|
| WP_OXIDATIVE_STRESS_RESPONSE   | Genes involved in oxidative stress<br>resoiobse by WikiPathways  | 28  | - | 0.21 | 1.43 | 3 |
| REACTOME_FATTY_ACID_METABOLISM | Genes involved in fatty acid<br>metabolism collected by Reactome | 171 | - | 0.24 | 1.40 | 6 |

1. Size, the number of genes enriched in the gene set; 2. FDR, false discovery rate; 3. NES, normalized enriched score; 4. GOBP, Gene Ontology Biological Process; 5. MOOTHA, gene set created by Broad Institute; 6. MODULE, gene involved in cancer collected by Broad Institute; 7. REACTOMEN, Reactome Database; 8. BIOCARTA, BioCarta Database; 9. KEGG, Kyoto Encyclopedia of Genes and Genomes; 10. WP, WikiPathways database.

**Table S3.** Metabolic pathways that were significantly enriched (FDR<0.2 and |NES|>1.5) in the gene expression data of the metabolism<sup>high</sup> compared with metabolism<sup>low</sup> group in the TCGA-LAML.

| Gene set name from MSigDB                   | Description of Gene set                                                                                    | Size <sup>1</sup> | NES <sup>2</sup> | FDR <sup>3</sup> |
|---------------------------------------------|------------------------------------------------------------------------------------------------------------|-------------------|------------------|------------------|
| GOBP_FATTY_ACID_BETA_OXIDATION <sup>4</sup> | Genes involved in the fatty acid<br>beta oxidation collected by Gene<br>Ontology                           | 75                | 1.83             | 0.042            |
| GOBP_GLUCOSE_IMPORT                         | Genes involved in glucose import<br>collected by Gene Ontology                                             | 63                | 1.76             | 0.042            |
| KEGG_CITRATE_CYCLE_TCA_CYCLE <sup>5</sup>   | Genes involved in citrate cycle<br>TCA cycle collected by Kyoto<br>Encyclopedia of Genes and<br>Genomes    | 30                | 1.57             | 0.081            |
| KEGG_GLYCOLYSIS_GLUONEOGENESIS              | Genes involved in Glycolysis<br>Gluconeogenesis collected by<br>Kyoto Encyclopedia of Genes and<br>Genomes | 54                | 1.61             | 0.080            |
| KEGG_OXIDATIVE_PHOSPHORYLATION              | Genes involved in oxidative<br>phosphorylation collected by<br>Kyoto Encyclopedia of Genes and<br>Genomes  | 125               | 1.59             | 0.082            |
| REACTOME_GLYCOLYSIS <sup>6</sup>            | Genes involved in glycolysis<br>collected by Reactome                                                      | 69                | 2.04             | 0.007            |
| REACTOME_GLUCOSE_METABOLISM                 | Genes involved in glucose<br>metabolism by Reactome                                                        | 87                | 2.06             | 0.007            |

1. Size, the number of genes enriched in the gene set; 2. FDR, false discovery rate; 3. NES, normalized enriched score; 4. GOBP, Gene Ontology Biological Process; 5. KEGG, Kyoto Encyclopedia of Genes and Genomes; 6. REACTOMEN, Reactome Database.

**Table S4.** The metabolism pathways of 33 prognosis-related genes identified by univariate Cox regression analysis

| Gene            | Full name of gene                                               | Related Metabolism pathway |
|-----------------|-----------------------------------------------------------------|----------------------------|
| <i>ACOXL</i>    | Acyl-CoA Oxidase Like                                           | Fatty acid metabolism      |
| <i>CRAT</i>     | Carnitine O-Acetyltransferase                                   | Fatty acid metabolism      |
| <i>SESN2</i>    | Sestrin 2                                                       | Fatty acid metabolism      |
| <i>ABCD1</i>    | ATP Binding Cassette Subfamily D Member 1                       | Fatty acid metabolism      |
| <i>HSD17B10</i> | Hydroxysteroid 17-Beta Dehydrogenase 10                         | Fatty acid metabolism      |
| <i>ECH1</i>     | Enoyl-CoA Hydratase 1                                           | Fatty acid metabolism      |
| <i>ECHS1</i>    | Enoyl-CoA Hydratase, Short Chain 1                              | Fatty acid metabolism      |
| <i>ETFB</i>     | Electron Transfer Flavoprotein Subunit Beta                     | Fatty acid metabolism      |
| <i>ABCB11</i>   | ATP Binding Cassette Subfamily B Member 11                      | Fatty acid metabolism      |
| <i>SORT1</i>    | Sortilin 1                                                      | Glycolysis                 |
| <i>C1QTNF12</i> | C1q And TNF Related 12                                          | Glycolysis                 |
| <i>PEA15</i>    | Proliferation And Apoptosis Adaptor Protein 15                  | Glycolysis                 |
| <i>SLC27A4</i>  | Solute Carrier Family 27 Member 4                               | Glycolysis                 |
| <i>INSR</i>     | Insulin Receptor                                                | Glycolysis                 |
| <i>PC</i>       | Pyruvate Carboxylase                                            | Glycolysis                 |
| <i>IDH3G</i>    | Isocitrate Dehydrogenase (NAD(+)) 3 Non-Catalytic Subunit Gamma | TCA cycle                  |
| <i>IDH3B</i>    | Isocitrate Dehydrogenase (NAD(+)) 3 Non-Catalytic Subunit Beta  | TCA cycle                  |
| <i>SDHB</i>     | Succinate Dehydrogenase Complex Iron Sulfur Subunit B           | TCA cycle                  |
| <i>ACO2</i>     | Aconitase 2                                                     | TCA cycle                  |
| <i>SUCLG1</i>   | Succinate-CoA Ligase GDP/ADP-Forming Subunit Alpha              | TCA cycle                  |
| <i>PGM1</i>     | Phosphoglucomutase 1                                            | Glycolysis                 |
| <i>HK1</i>      | Hexokinase 1                                                    | Glycolysis                 |
| <i>ALDOC</i>    | Aldolase, Fructose-Bisphosphate C                               | Glycolysis                 |
| <i>ALDH2</i>    | Aldehyde Dehydrogenase 2                                        | Fatty acid metabolism      |
| <i>PFKL</i>     | Phosphofructokinase, Liver Type                                 | Glycolysis                 |
| <i>ENO1</i>     | $\alpha$ -Enolase 1                                             | Glycolysis                 |
| <i>PFKP</i>     | Phosphofructokinase, Platelet                                   | Glycolysis                 |

|                |                                                           |            |
|----------------|-----------------------------------------------------------|------------|
| <i>AKR1A1</i>  | Aldo-Keto Reductase Family 1 Member A1                    | Glycolysis |
| <i>CYC1</i>    | Cytochrome C1                                             | TCA cycle  |
| <i>SDHA</i>    | Succinate Dehydrogenase Complex Flavoprotein<br>Subunit A | TCA cycle  |
| <i>NUP210</i>  | Nucleoporin 210                                           | Glycolysis |
| <i>PPP2R1A</i> | Protein Phosphatase 2 Scaffold Subunit Aalpha             | Glycolysis |
| <i>HK2</i>     | Hexokinase 2                                              | Glycolysis |

---

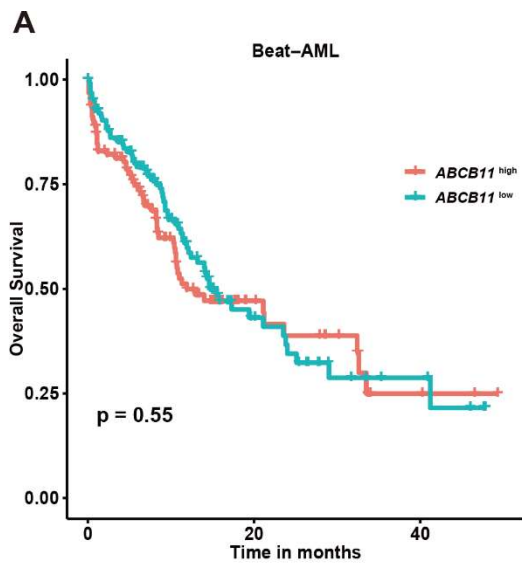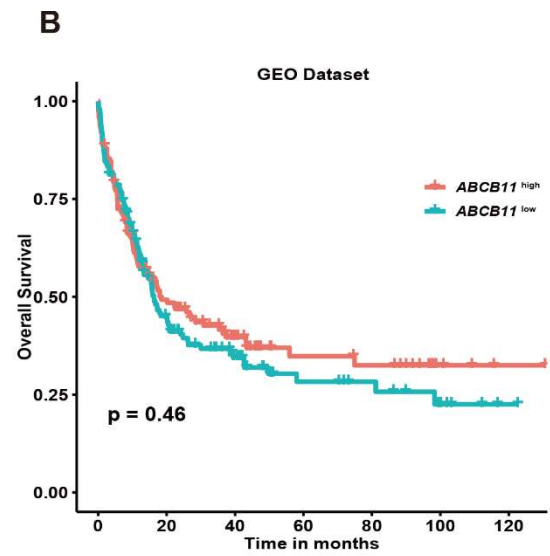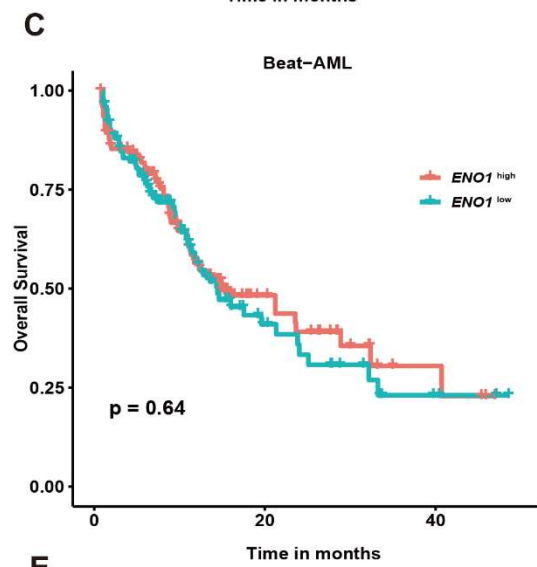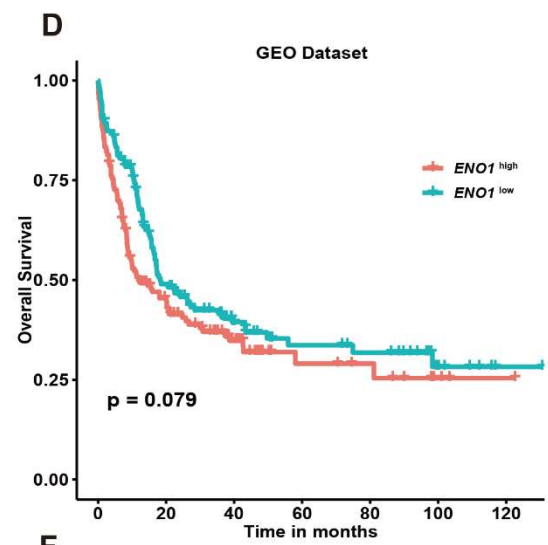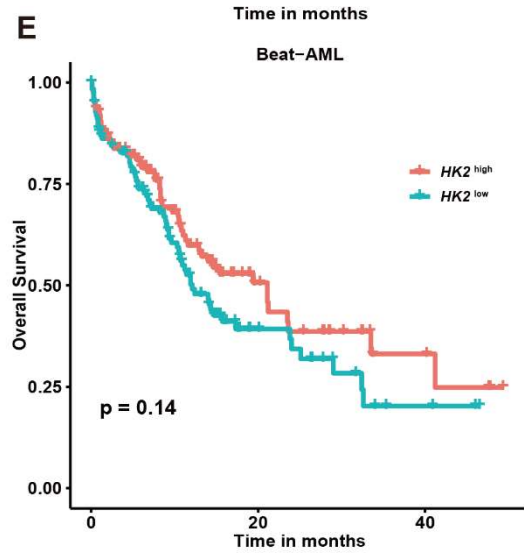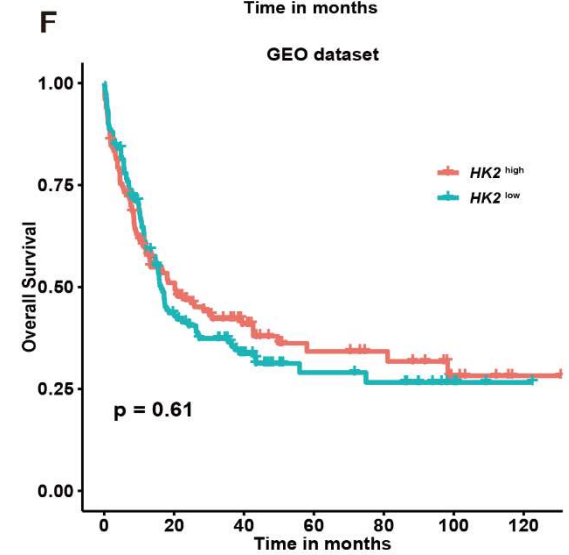

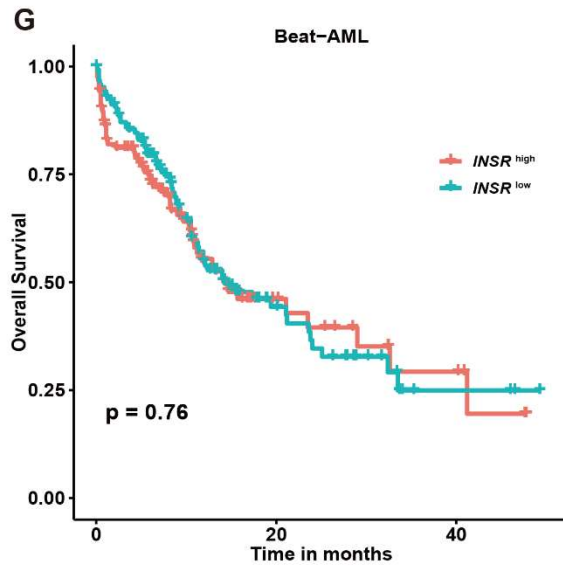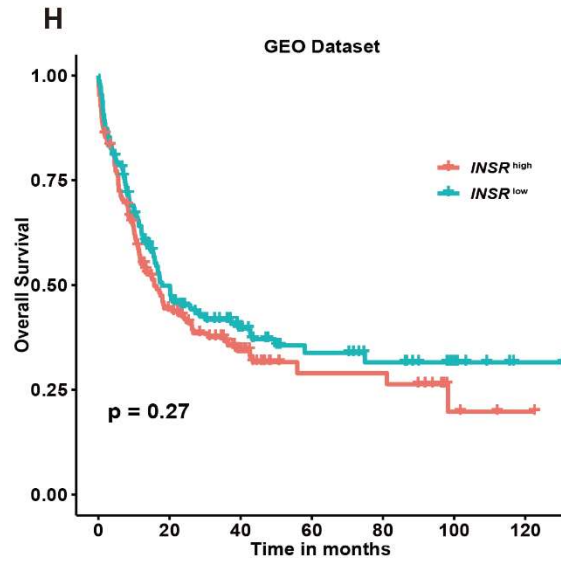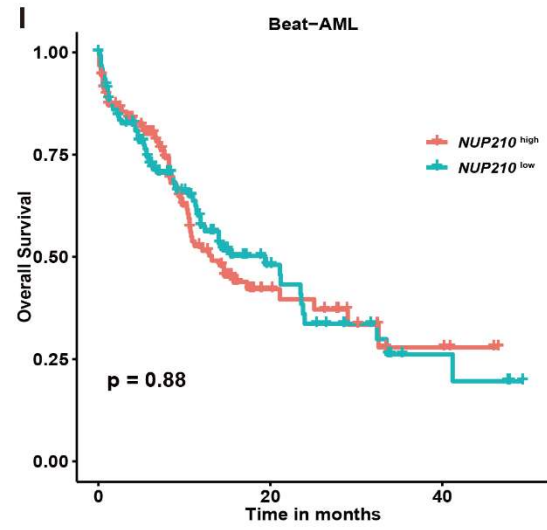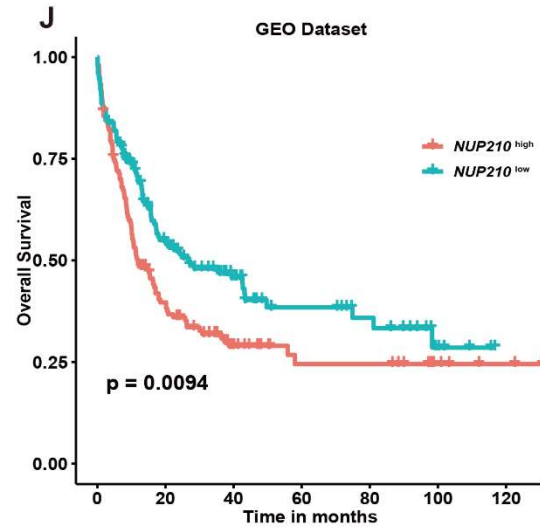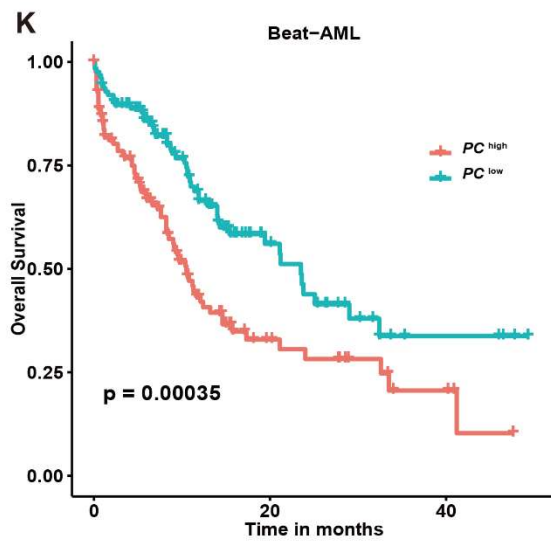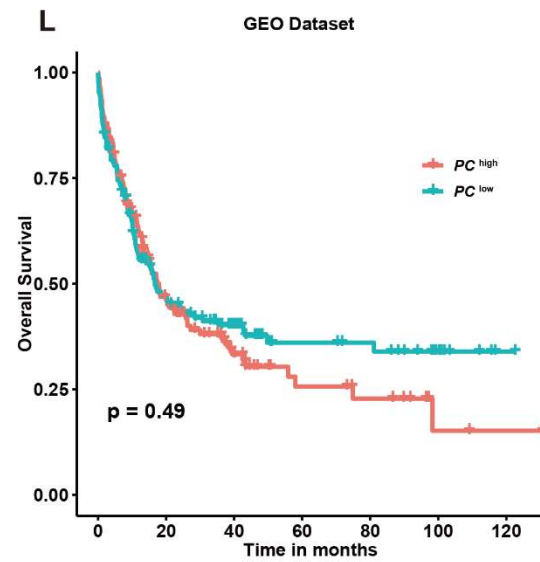

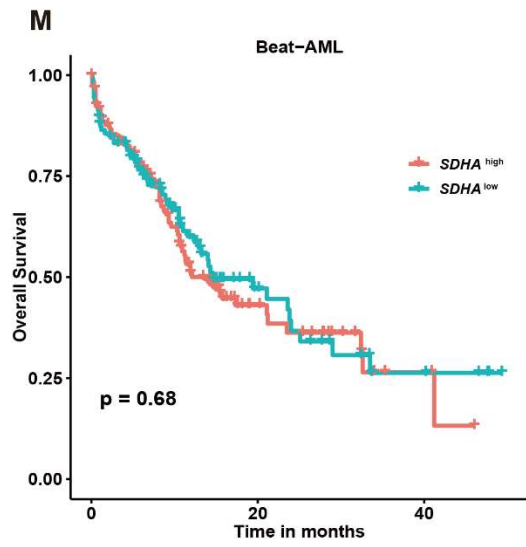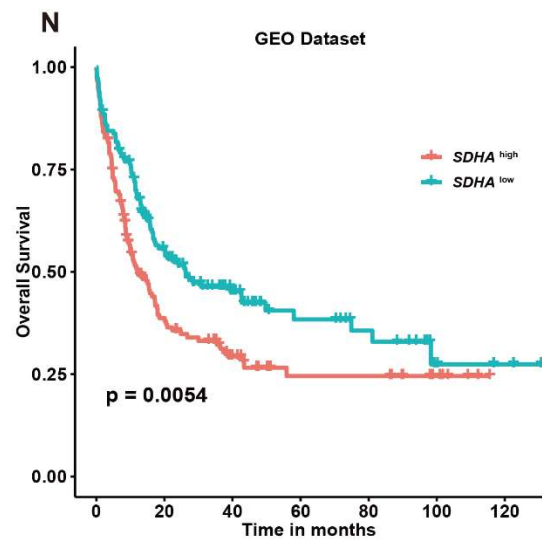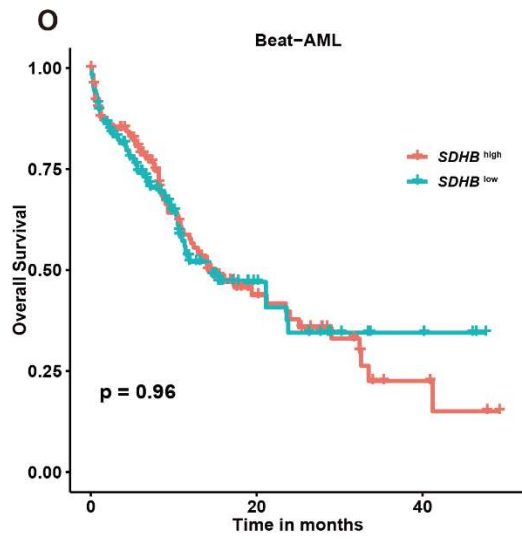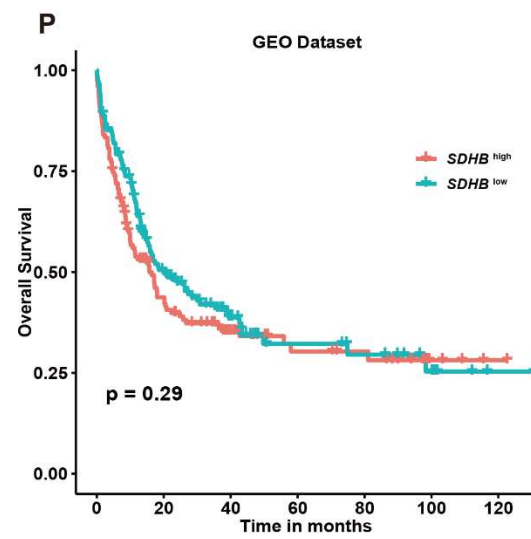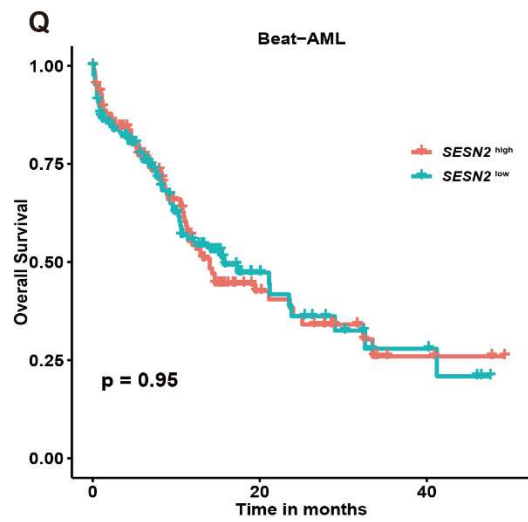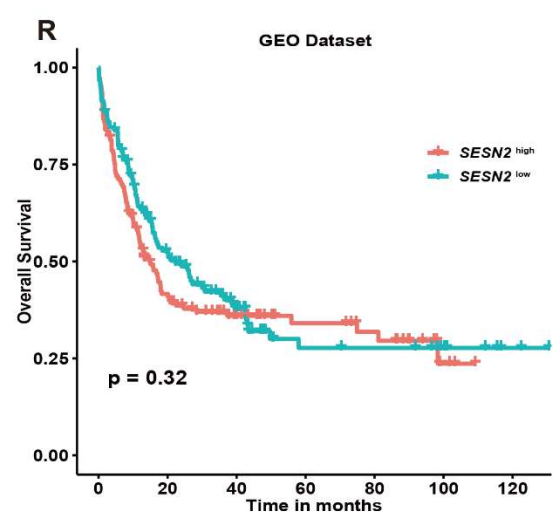

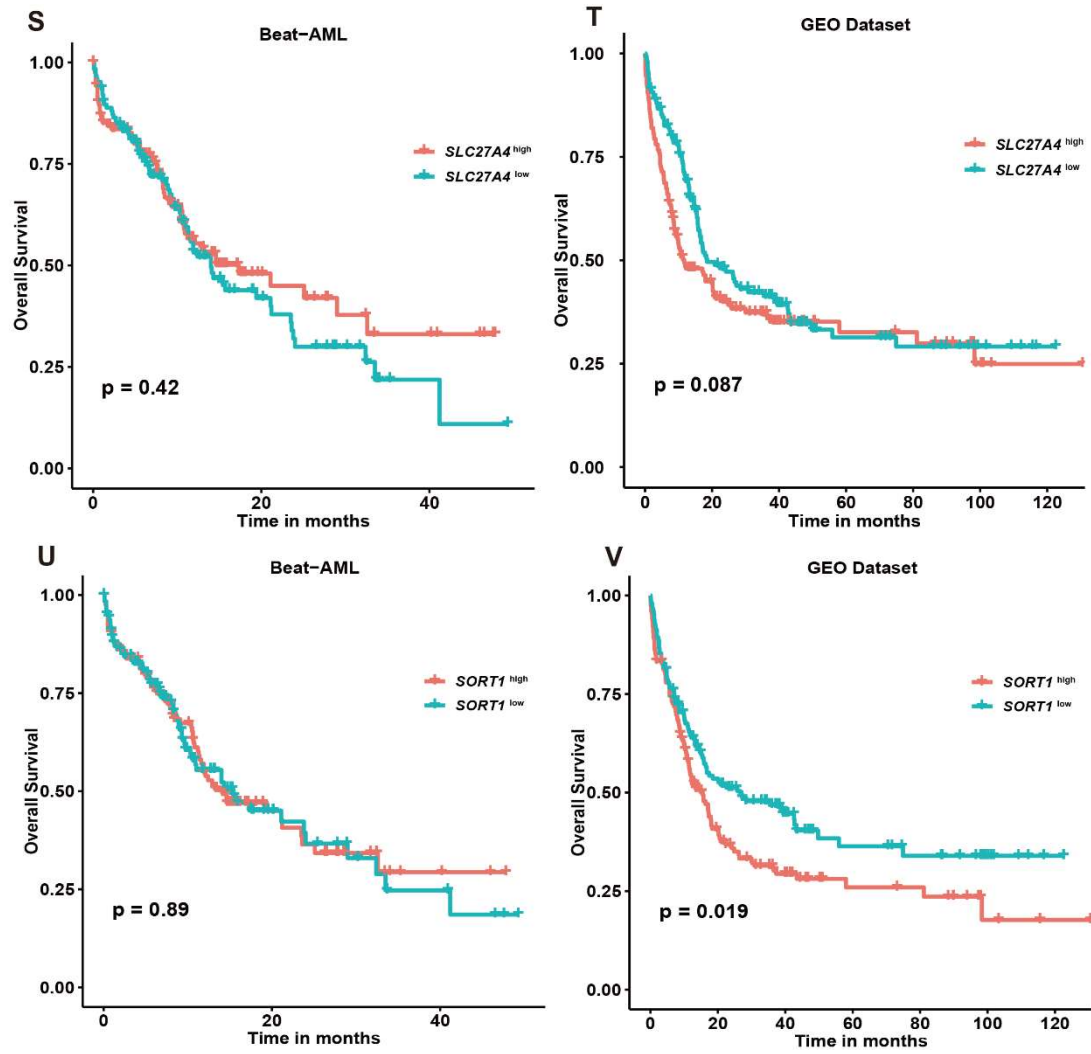

**Figure S1.** Kaplan–Meier curves for overall survival of AML patients with high and low expression of *ABCB11*, *ENO1*, *HK2*, *INSR*, *NUP210*, *PC*, *SDHA*, *SDHB*, *SESN2*, *SLC27A4* and *SORT1* in the Beat-AML (A, C, E, G, I, K, M, O, Q, S, U) and GEO cohorts (B, D, F, H, J, L, N, P, R, T, V).
